# Supplementary material for: Development and validation of a nomogram for failure to collect oocytes in POSEIDON Groups 3 and 4 undergoing IVF/ICSI treatment
Source: PubMed Central journal article supplement — Sci Rep. 2024 Dec 28;14:31316. doi: 10.1038/s41598-024-82783-z (PMC11682411; doi:10.1038/s41598-024-82783-z), 2024-12-28
Supplement: 41598_2024_82783_MOESM1_ESM.pdf [file 41598_2024_82783_MOESM1_ESM.pdf]

**True positive rate (sensitivity)**

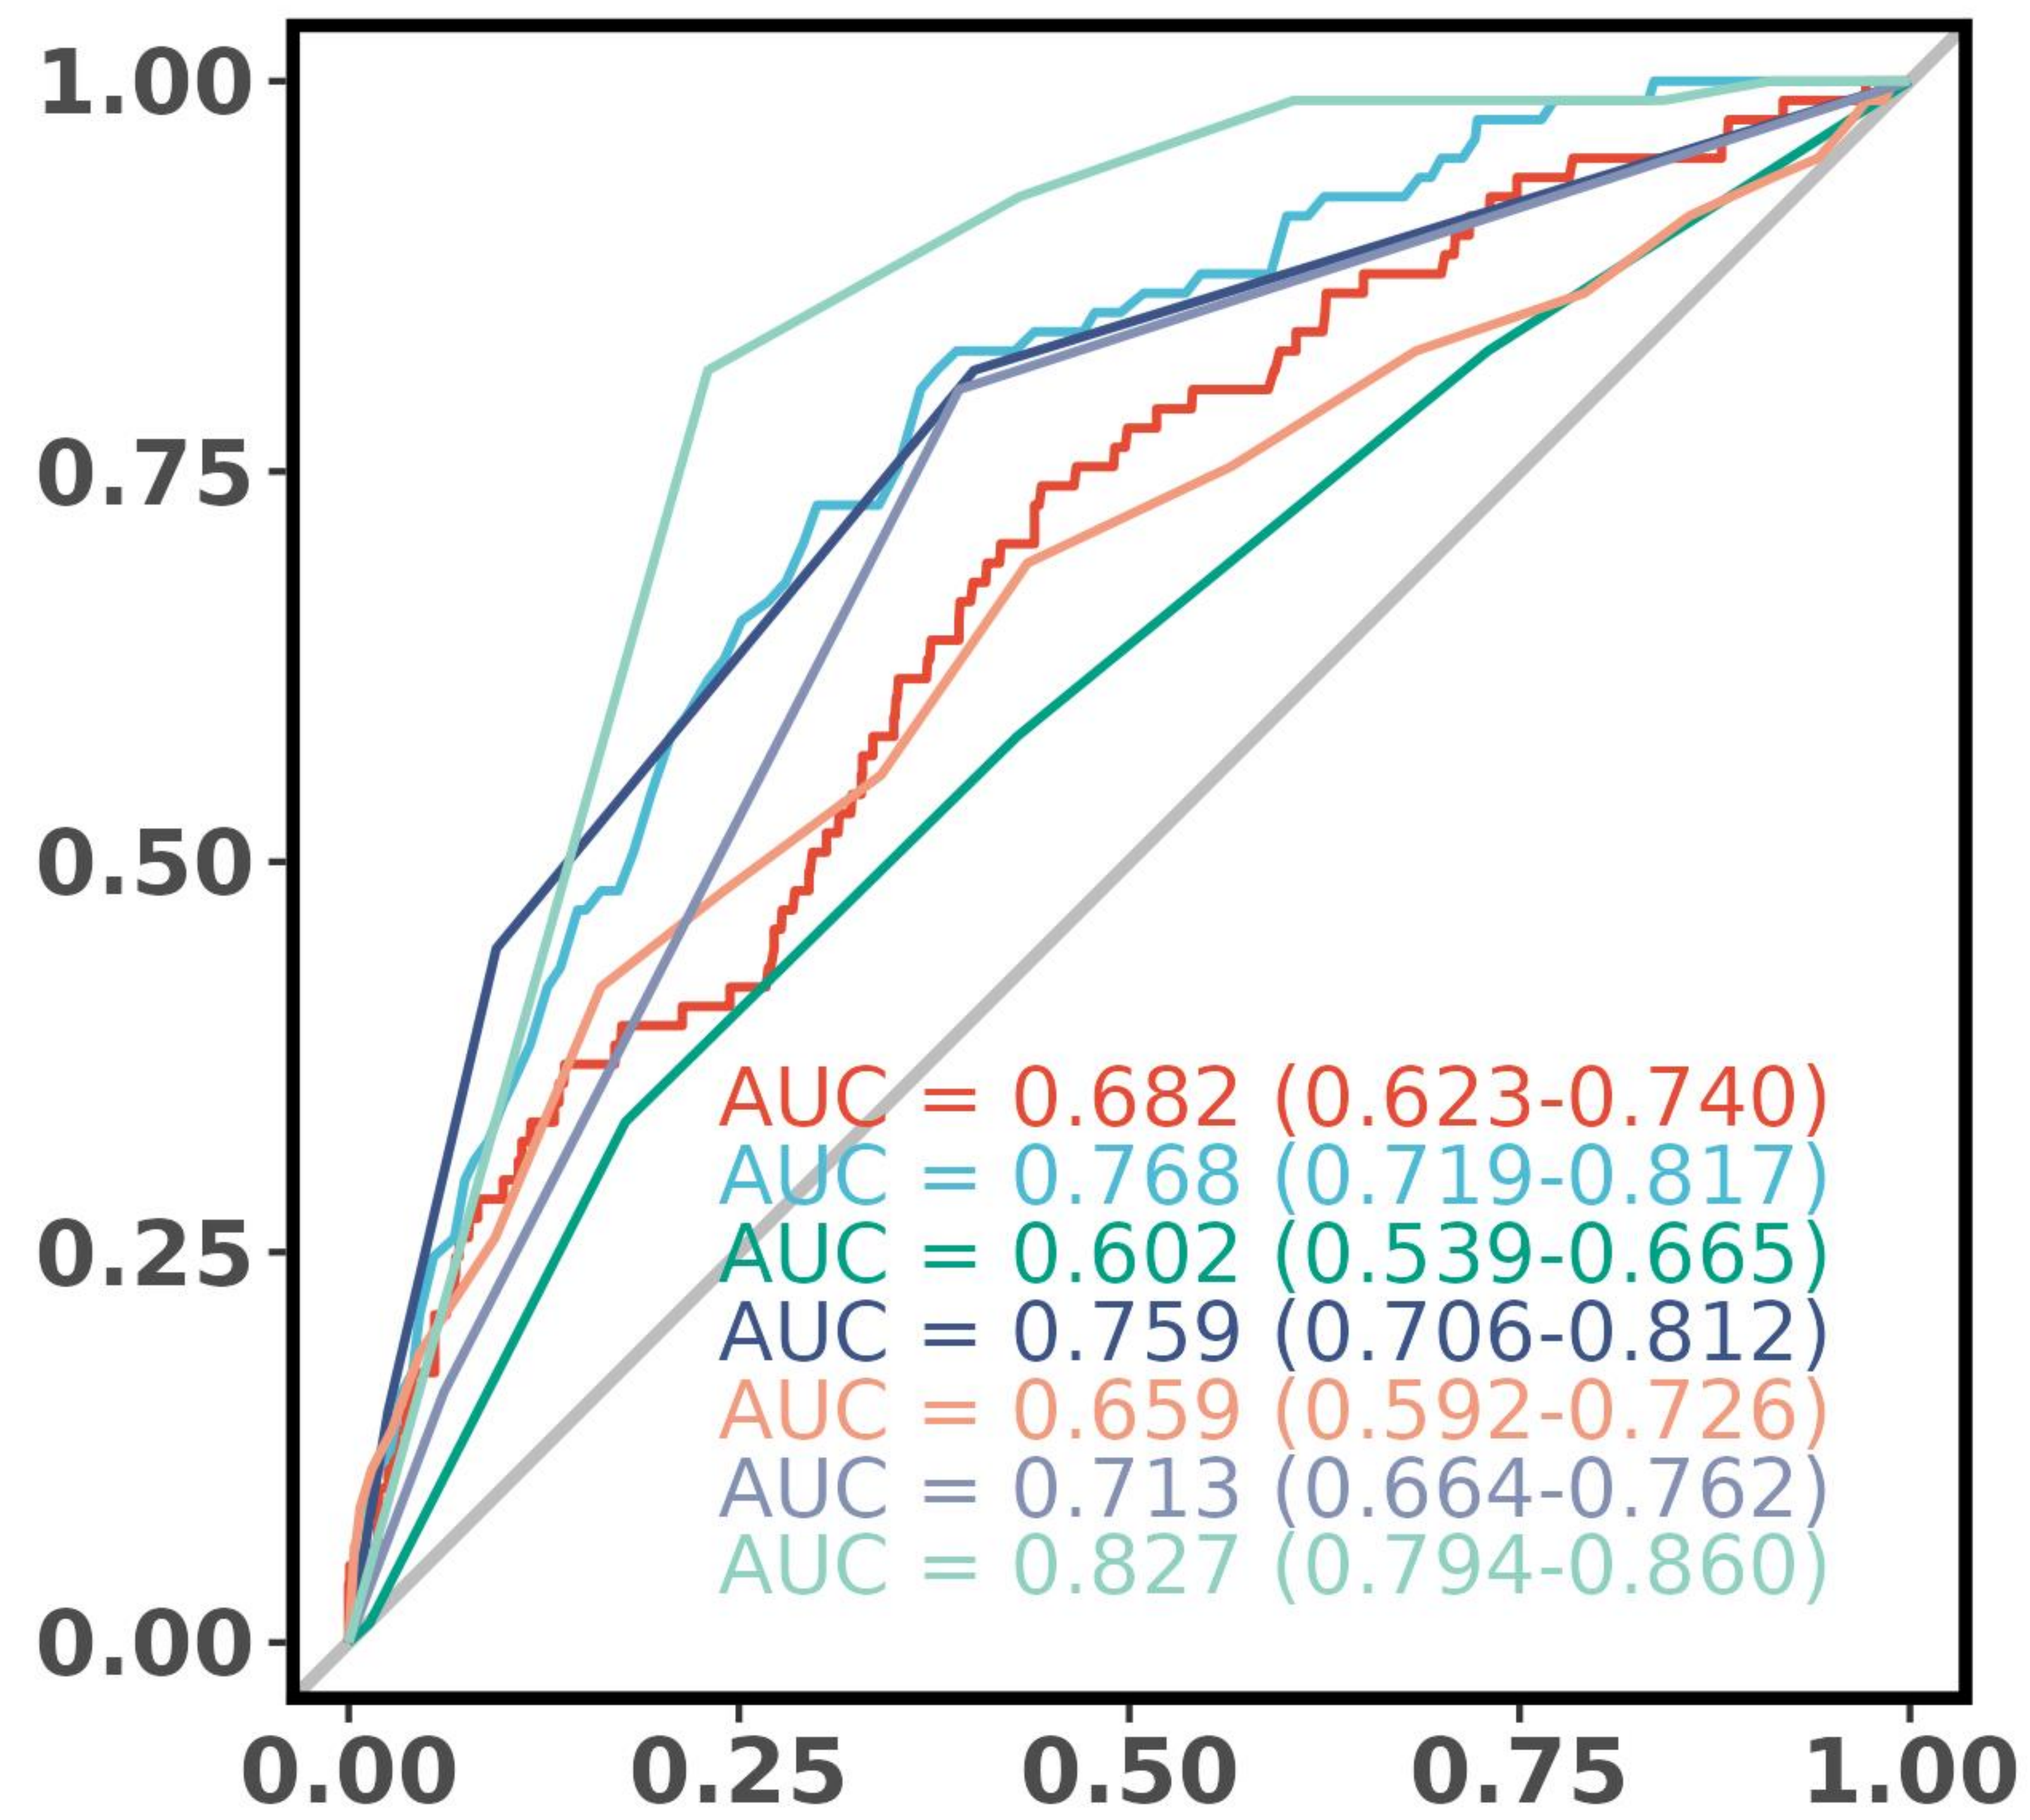

- Basal FSH
- AMH
- AFC
- COS protocol
- Duaration of stimulation
- $\Delta E2$
- No. of follicles  $\geq 14$ mm on trigger

**False positive rate (1 - specificity)**
